# Supplementary material
Source: PubMed Central journal article supplement (PMC5031370)
Supplement: NIHMS810548-supplement.pdf [file NIHMS810548-supplement.pdf]

**Appendix**  
**Warm Handoff Versus Fax Referral for Linking Hospitalized Smokers to Quitlines**  
**Richter et al.**

**Appendix.** Inpatient and Outpatient Counseling, Telephone, and Pharmacotherapy Costs

|                  | Cost                                               | Unit value                          | Fax                          | Warm handoff                 | <i>p</i> -value   |
|------------------|----------------------------------------------------|-------------------------------------|------------------------------|------------------------------|-------------------|
| Inpatient costs  | <b>Hospital-borne counseling costs<sup>a</sup></b> | <b>\$31.91/hr</b>                   | <b>\$9.41</b><br>(17.69 min) | <b>\$5.77</b><br>(10.85 min) | <b>&lt;0.0001</b> |
|                  | Quitline-borne counseling costs                    |                                     |                              |                              |                   |
|                  | In-hospital QL enrollment                          | \$31.91/hr                          | \$0<br>(0 min)               | \$2.08<br>(3.90 min)         | -                 |
|                  | In-hospital QL counseling                          | \$31.91/hr                          | \$0<br>(0 min)               | \$6.89<br>(12.95 min)        | -                 |
|                  | <i>Sum of inpatient costs</i>                      |                                     | <b>\$9.41</b>                | <b>\$14.73</b>               | <b>&lt;0.0001</b> |
| Outpatient costs | <b>Post-dx QL enrollment<sup>b</sup></b>           | <b>\$31.91/hr</b>                   | <b>\$1.25</b><br>(2.35 min)  | <b>\$0.13</b><br>(0.24 min)  | <b>&lt;0.0001</b> |
|                  | Post-dx QL counseling                              | \$31.91/hr                          | \$11.73<br>(22.05 min)       | \$11.63<br>(21.87 min)       | 0.9196            |
|                  | <i>Sum of counseling costs</i>                     |                                     | <b>\$22.39</b>               | <b>\$26.49</b>               | <b>&lt;0.0001</b> |
|                  | <b>Telephone costs</b>                             | <b>\$0.035/min</b>                  | <b>\$0.85</b>                | <b>\$1.36</b>                | <b>&lt;0.0001</b> |
|                  | Pharmacotherapy costs                              | Product-specific costs <sup>c</sup> | \$65.95<br>(6.10 days)       | \$61.86<br>(4.70 days)       | 0.6942            |
|                  | <i>Sum of outpatient costs</i>                     |                                     | <b>\$79.78</b>               | <b>\$74.98</b>               | 0.6516            |
|                  | Total costs per participant                        |                                     | \$89.19                      | \$89.72                      | 0.9599            |
|                  | Total costs per abstinent participant <sup>d</sup> |                                     | 352.53                       | 353.23                       | --                |

Note: Boldface indicates statistical significance ( $p < 0.0001$ ).

<sup>a</sup>\$31.91/hr = National mean wage for health educator (occupational code 21-1091, May 2012, BLS.gov) plus 25% fringe benefit rate

<sup>b</sup>One participant in warm handoff was enrolled in quitline post-discharge

<sup>c</sup>Products were not provided by the trial, but were included in societal perspective of cost analysis

<sup>d</sup>Calculated by cost per participant / proportion of participants quit in each arm.
